# Supplementary material for: ParaCEST MRI contrast agents capable of derivatizationvia “click” chemistry
Source: Royal Society of Chemistry journal article supplement (doi:10.1039/c1ob06162c), 2011-09-27

**Supplemental Information**  
for  
**ParaCEST Contrast Agents Capable of Derivatization via “Click”  
Chemistry**

**Mark Milne<sup>\*a</sup>, Kirby Chicas<sup>a</sup>, Alex Li<sup>b</sup>, Robert Bartha<sup>b</sup> and Robert H.E. Hudson<sup>a</sup>**

**Table of Contents**

|      |                                               |
|------|-----------------------------------------------|
| S1.  | NMR Spectra of <b>Yb-1</b>                    |
| S2.  | NMR Spectra of <b>Ce-1</b>                    |
| S3.  | NMR Spectra of <b>Eu-1</b>                    |
| S4.  | NMR Spectra of <b>Tm-1</b>                    |
| S5.  | NMR Spectra of <b>Tb-1</b>                    |
| S6.  | NMR Spectra of <b>Er-1</b>                    |
| S7.  | NMR Spectra of <b>Gd-1</b>                    |
| S8.  | NMR Spectra of <b>Ho-1</b>                    |
| S9.  | NMR Spectra of <b>Dy-1</b>                    |
| S10. | NMR Spectra of <b>Sm-1</b>                    |
| S11. | NMR Spectra of <b>Nd-1</b>                    |
| S12. | NMR Spectra of <b>Pr-1</b>                    |
| S13. | NMRD Profile of <b>Gd-1</b>                   |
| S14. | NMRD Profile of <b>Gd-2</b>                   |
| S15. | NMRD Profile of <b>Gd-3</b>                   |
| S16. | CEST Spectra of <b>Dy-1</b>                   |
| S17. | CEST Spectra of <b>Dy-2</b>                   |
| S18. | CEST Spectra of <b>Dy-3</b>                   |
| S19. | CEST Spectra of <b>Tb-1</b>                   |
| S20. | CEST Spectra of <b>Tb-2</b>                   |
| S21. | CEST Spectra of <b>Tb-3</b>                   |
| S22. | CEST Spectra of <b>Tm-1</b>                   |
| S23. | CEST Spectra of <b>Tm-2</b>                   |
| S24. | CEST Spectra of <b>Tm-3</b>                   |
| S25. | HPLC Trace of <b>Ln-2</b> ( $R_t = 7.55$ min) |
| S26. | HPLC Trace of <b>Ln-3</b> ( $R_t = 1.50$ min) |
| S27. | Relaxivity comparison of Gd series at 20 MHz  |
| S28. | Relaxivity comparison of Gd series at 400 MHz |
| S29. | CEST comparison of Eu series (Water)          |
| S30. | CEST comparison of Tm series (Amide)          |

### S1. NMR Spectra of Yb-1

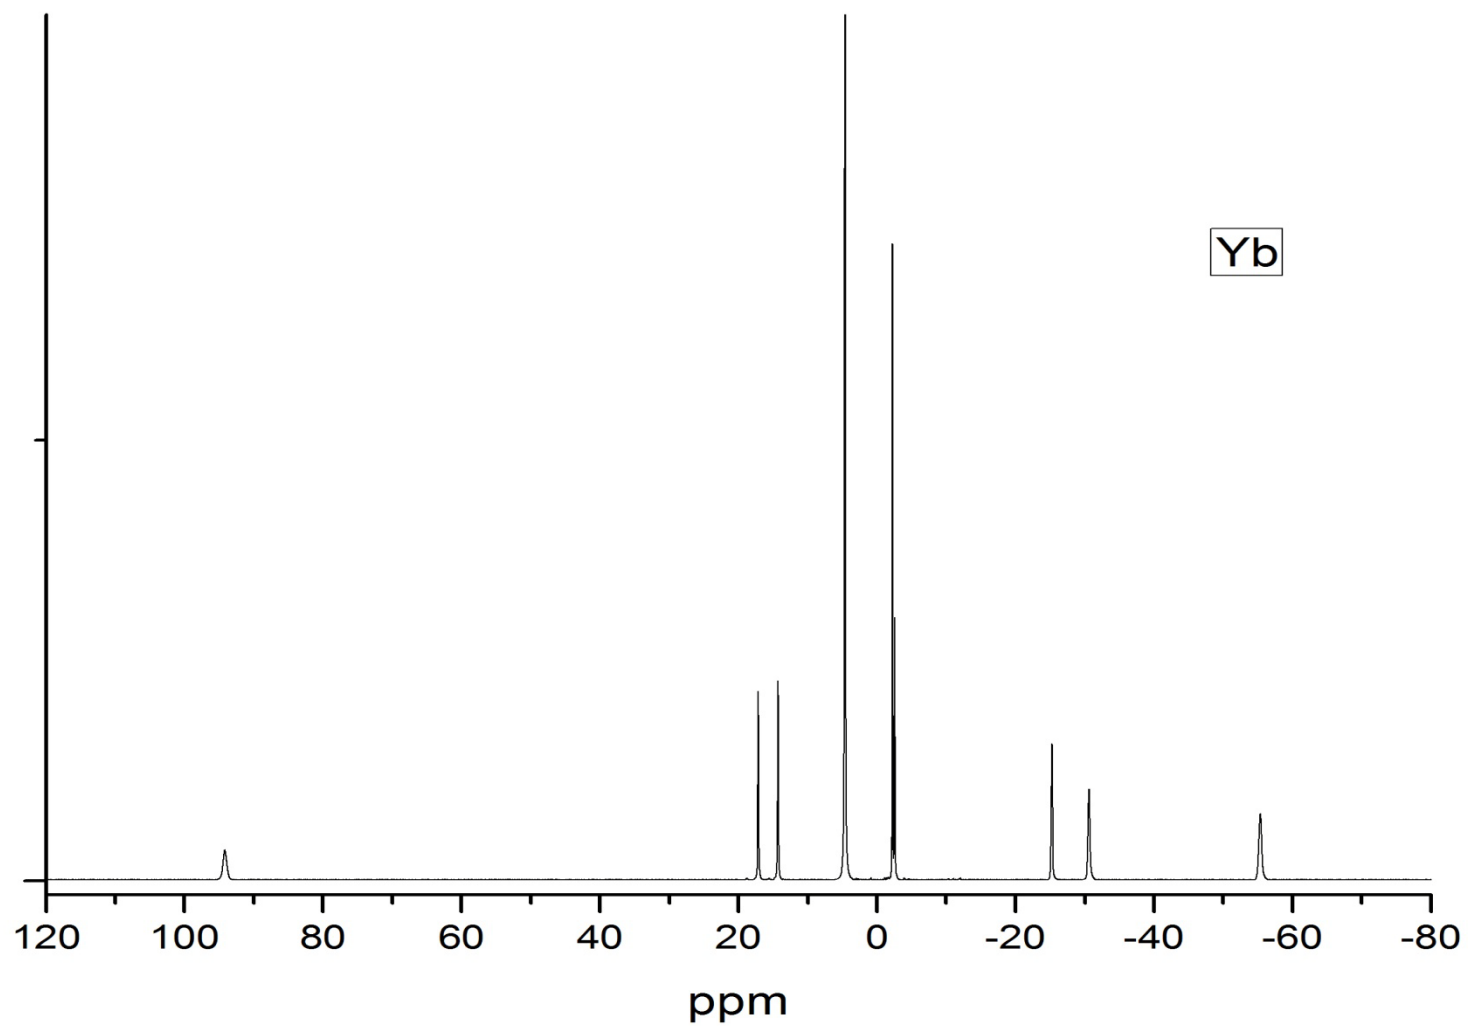

## S2. NMR Spectra of Ce-1

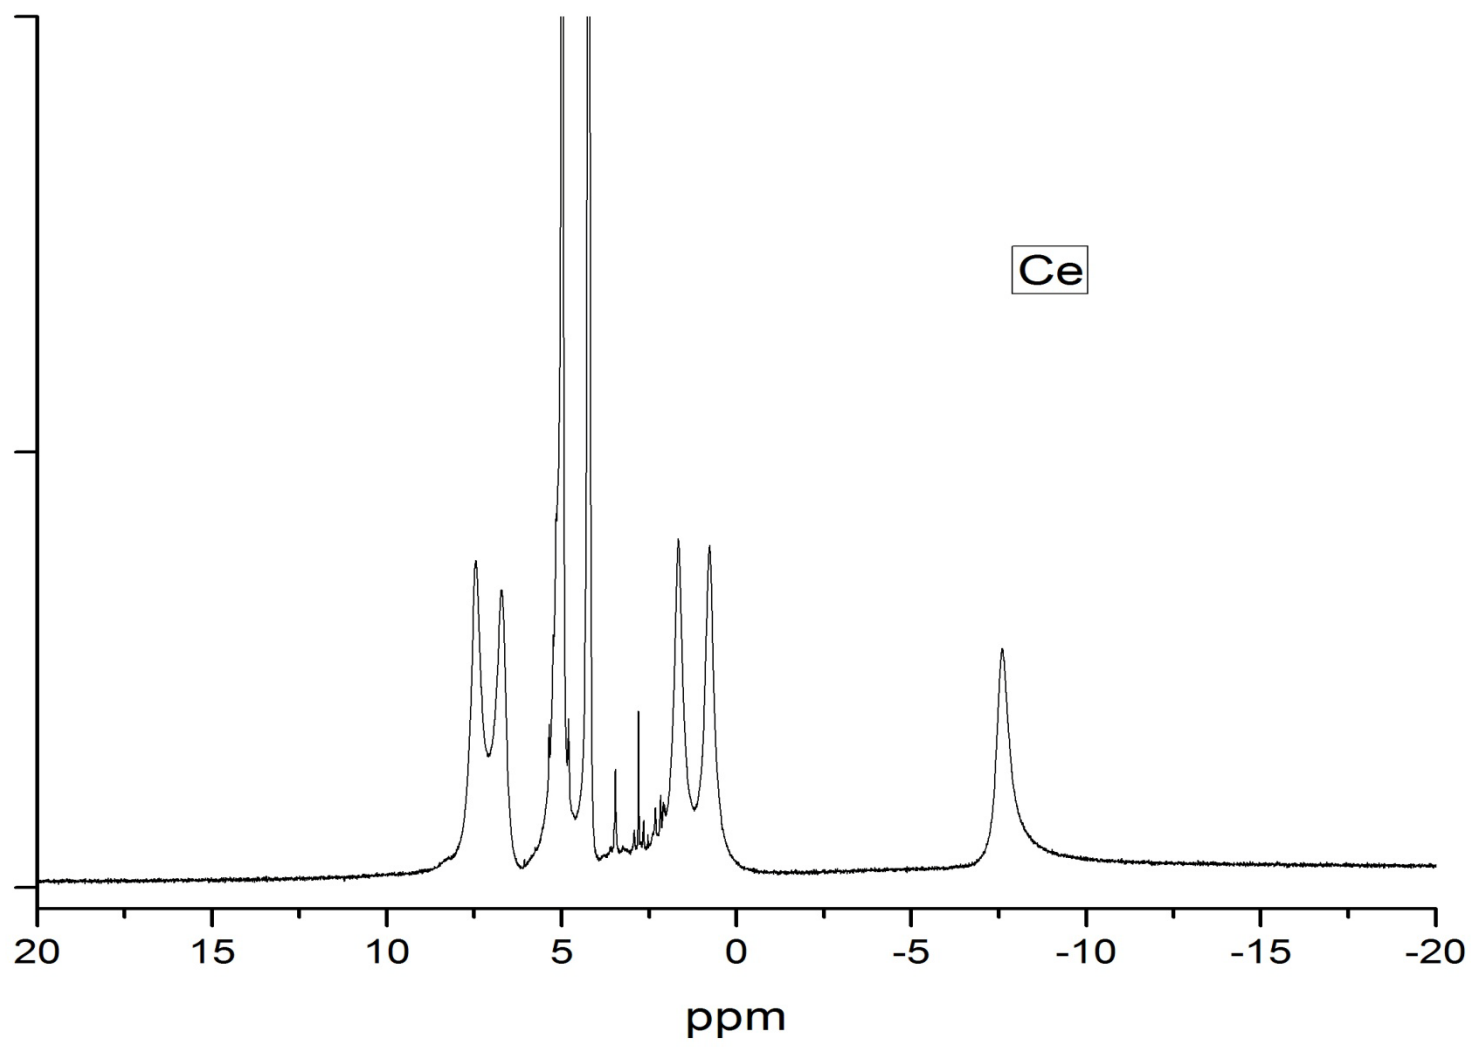

### S3. NMR Spectra of Eu-1

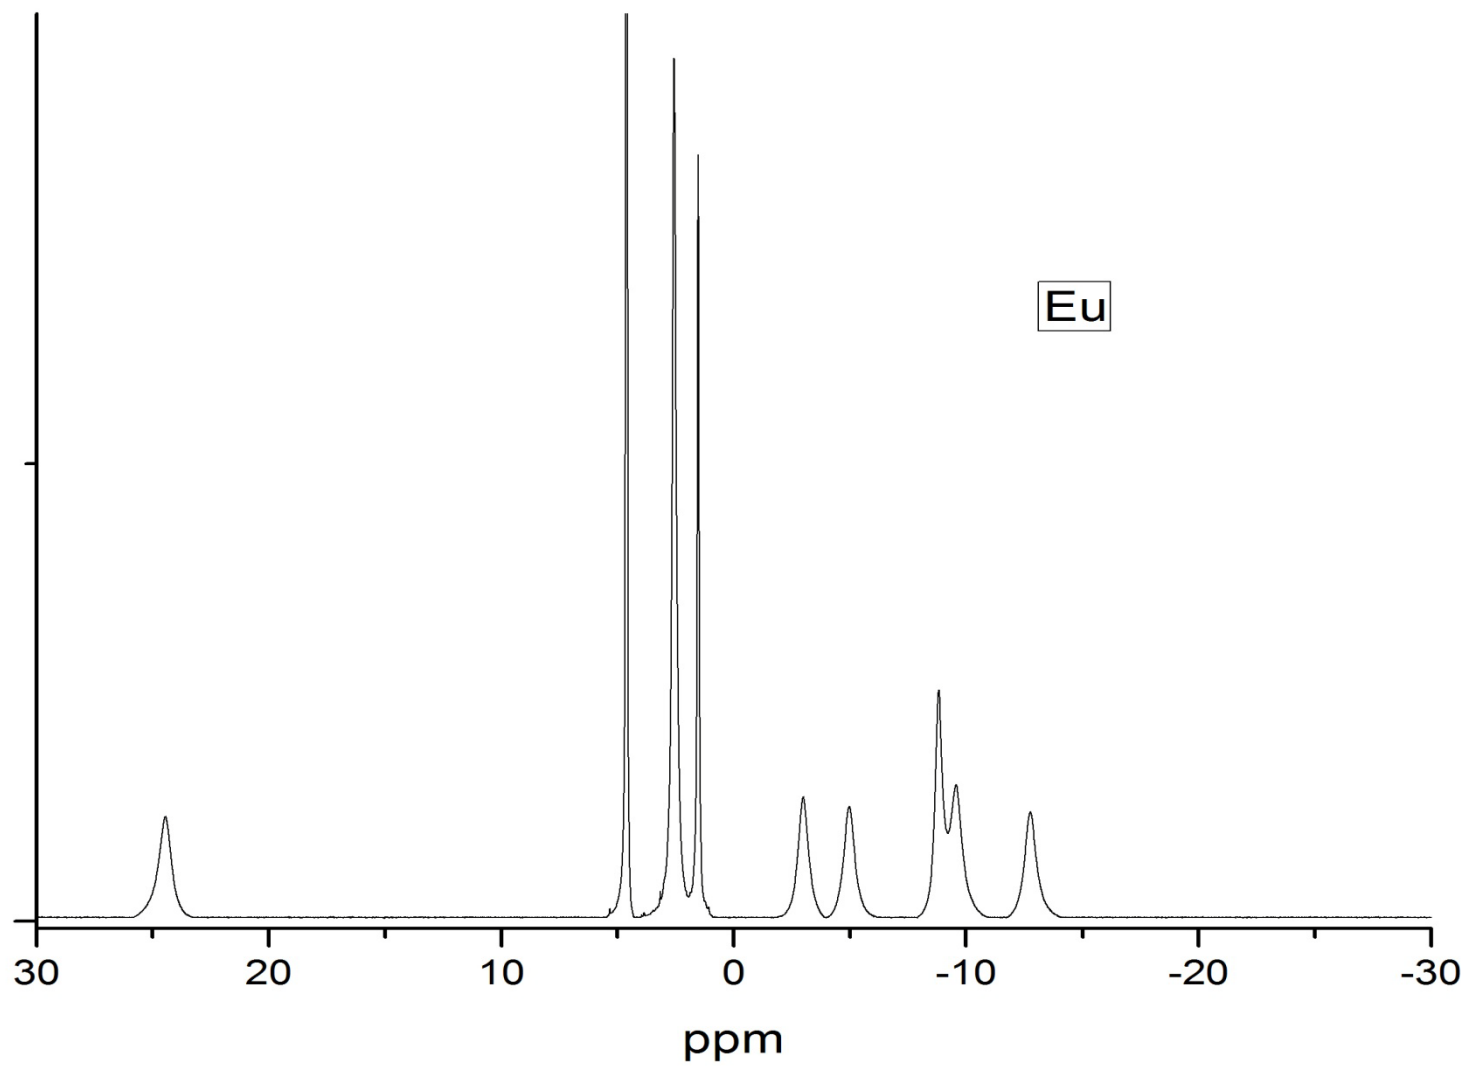

### S4. NMR Spectra of Tm-1

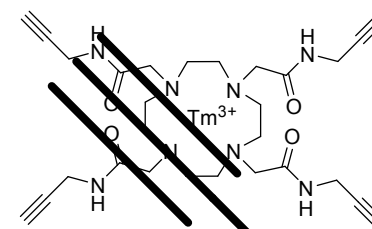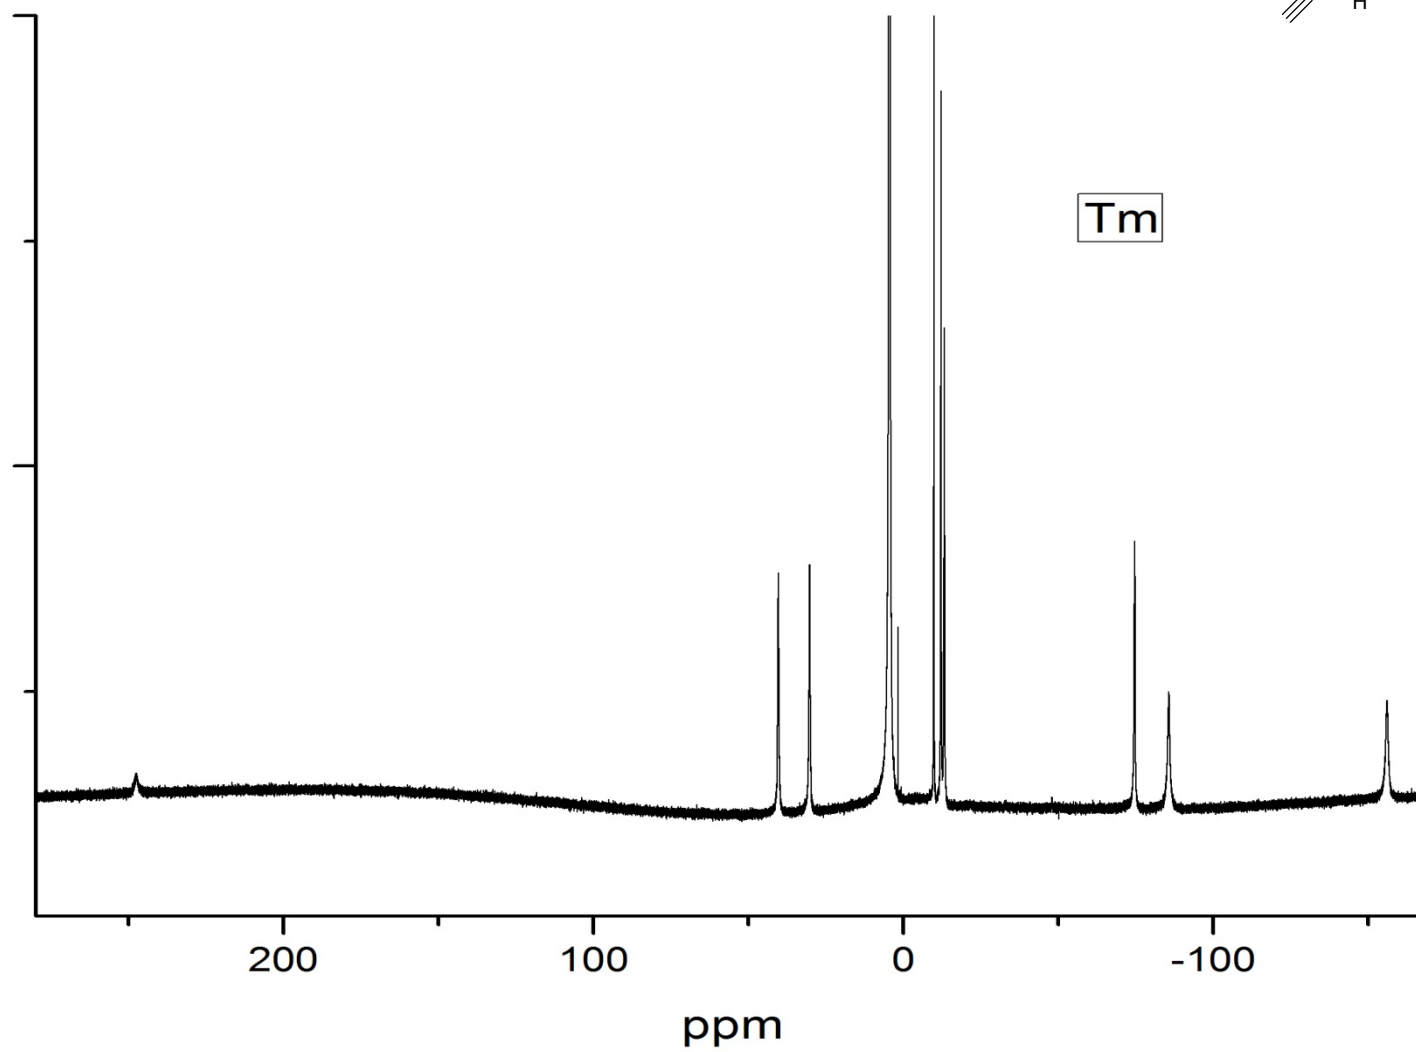

### S5. NMR Spectra of Tb-1

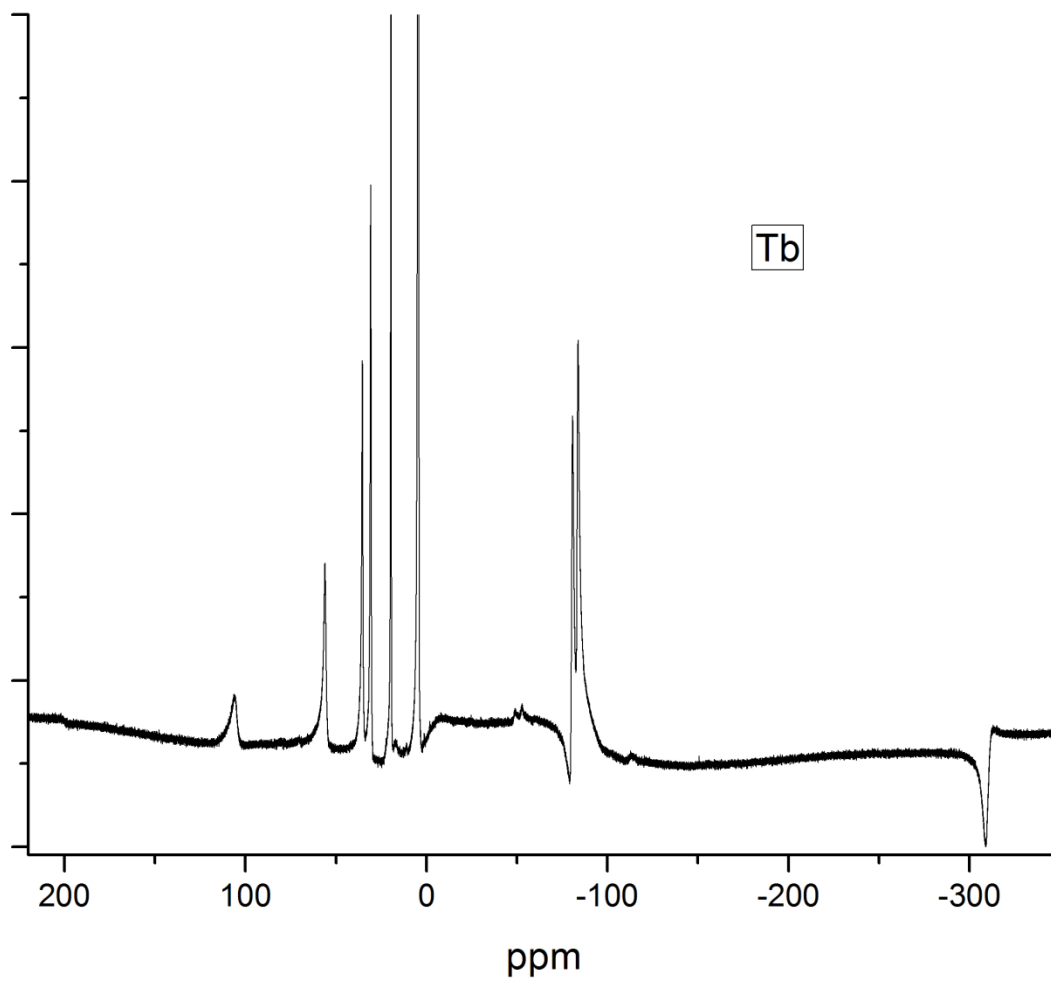

### S6. NMR Spectra of Er-1

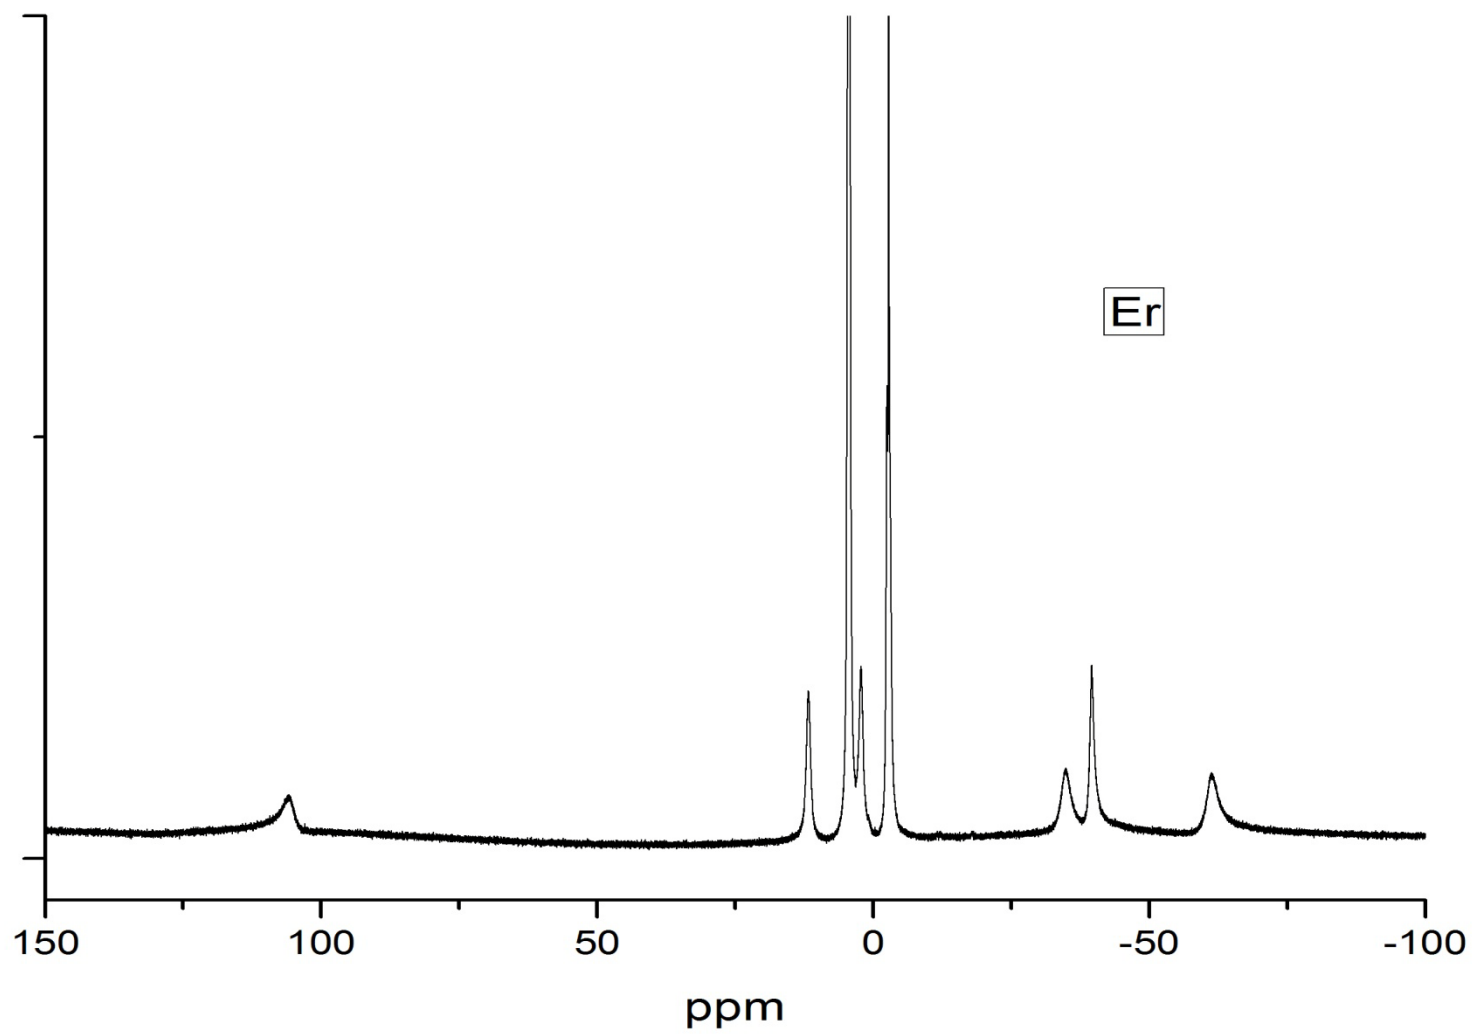

### S7. NMR Spectra of Gd-1

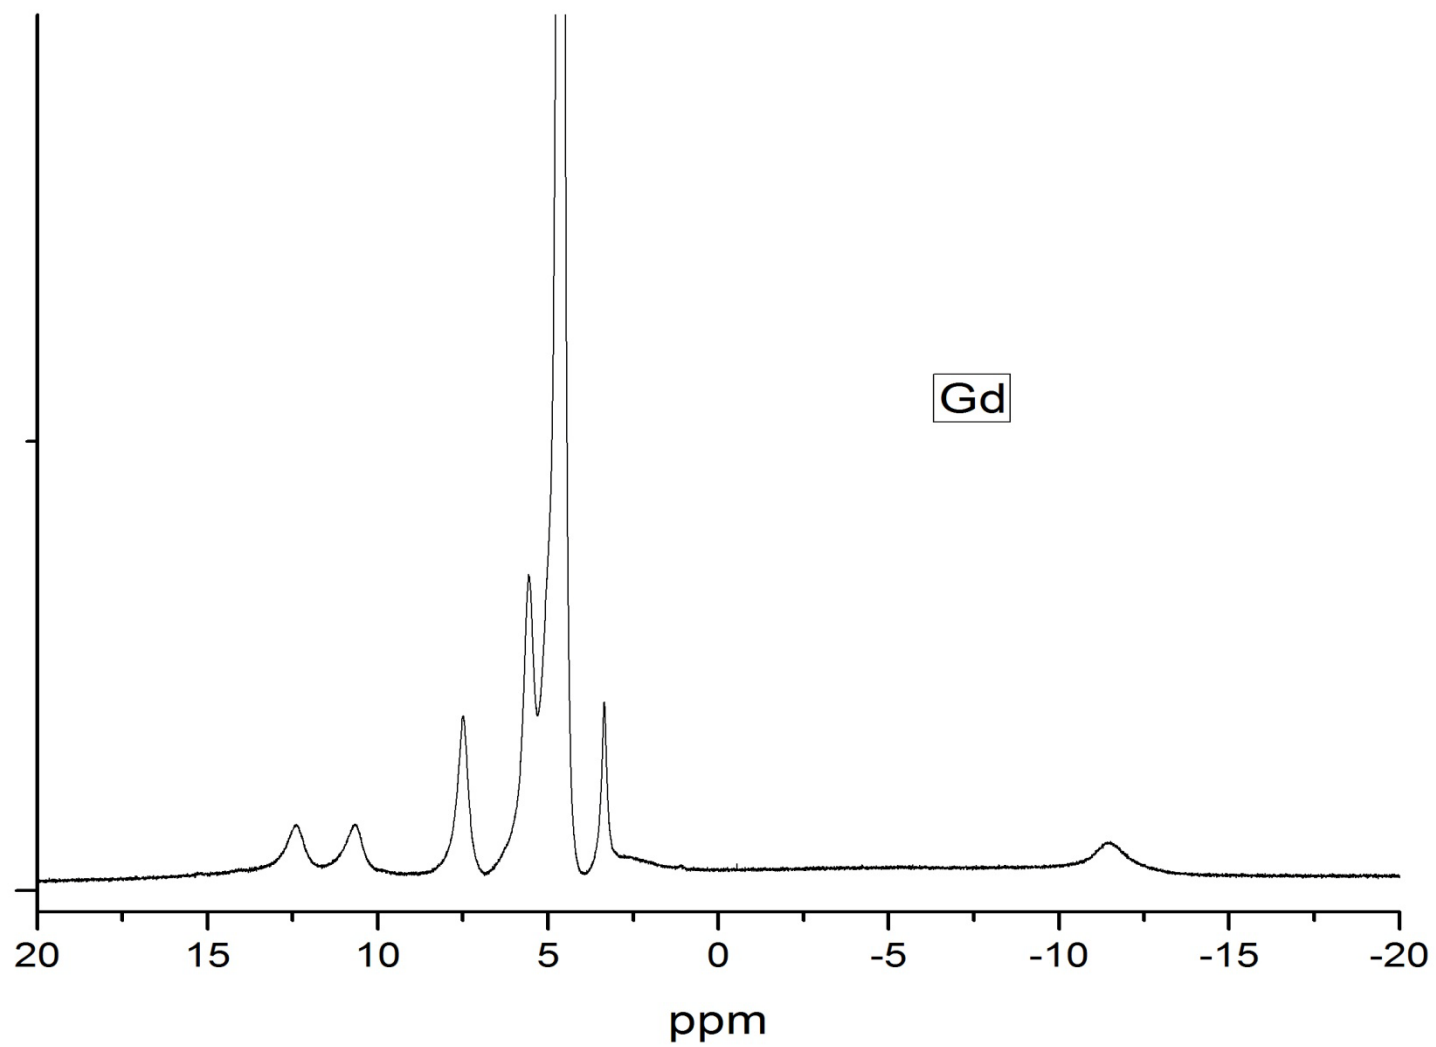





### S8. NMR Spectra of Ho-1

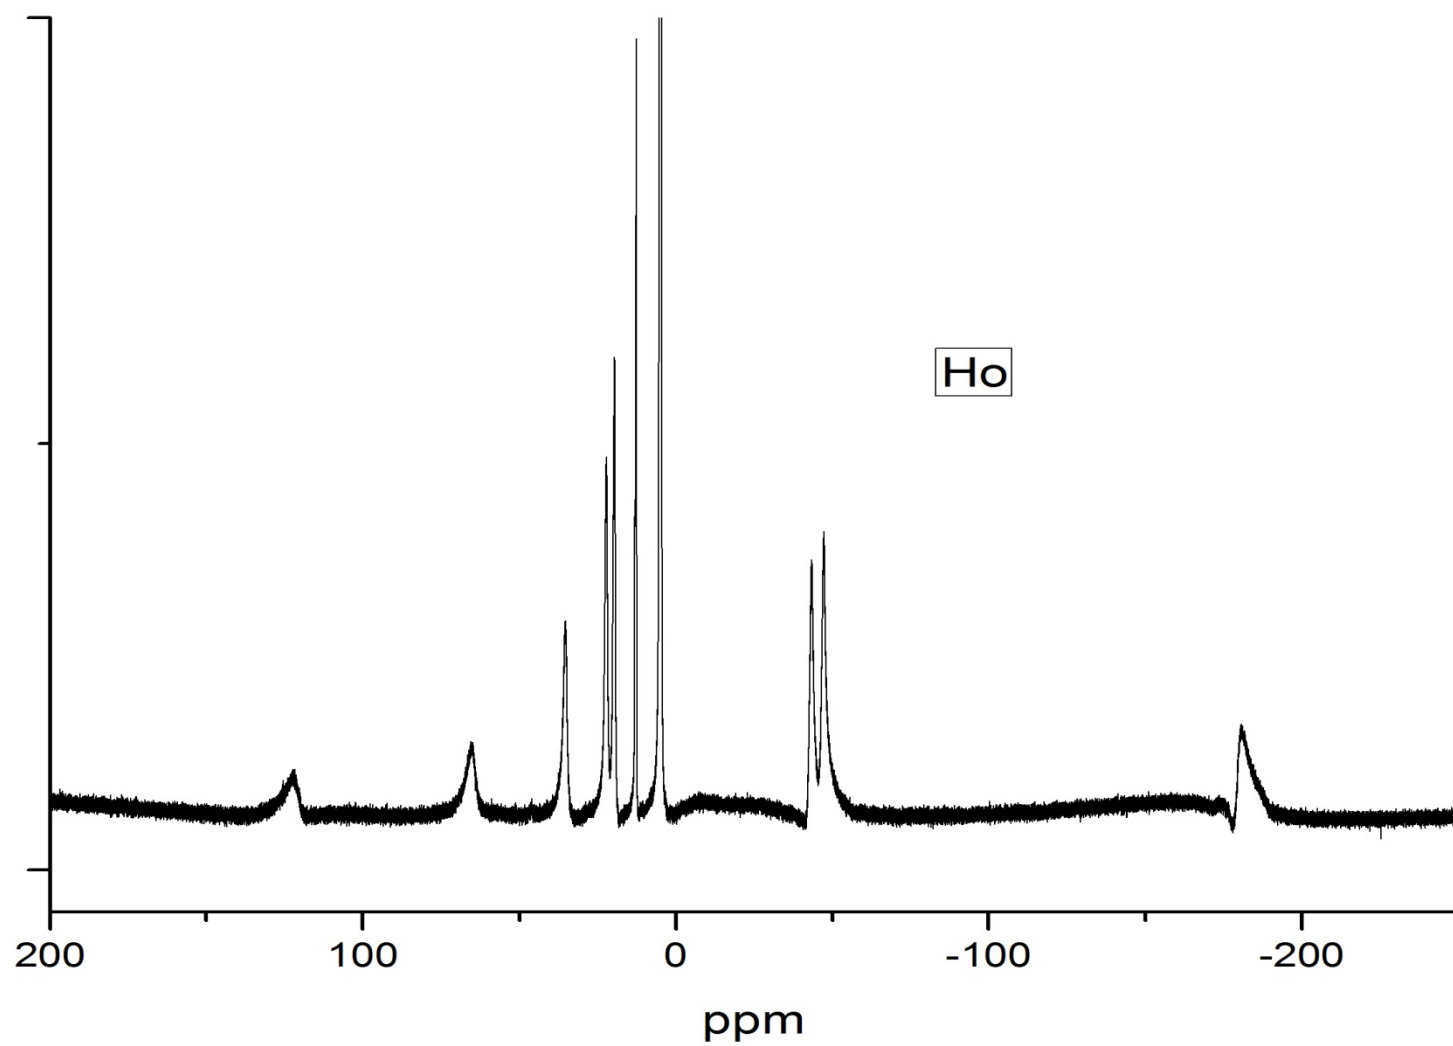

### S9. NMR Spectra of Dy-1

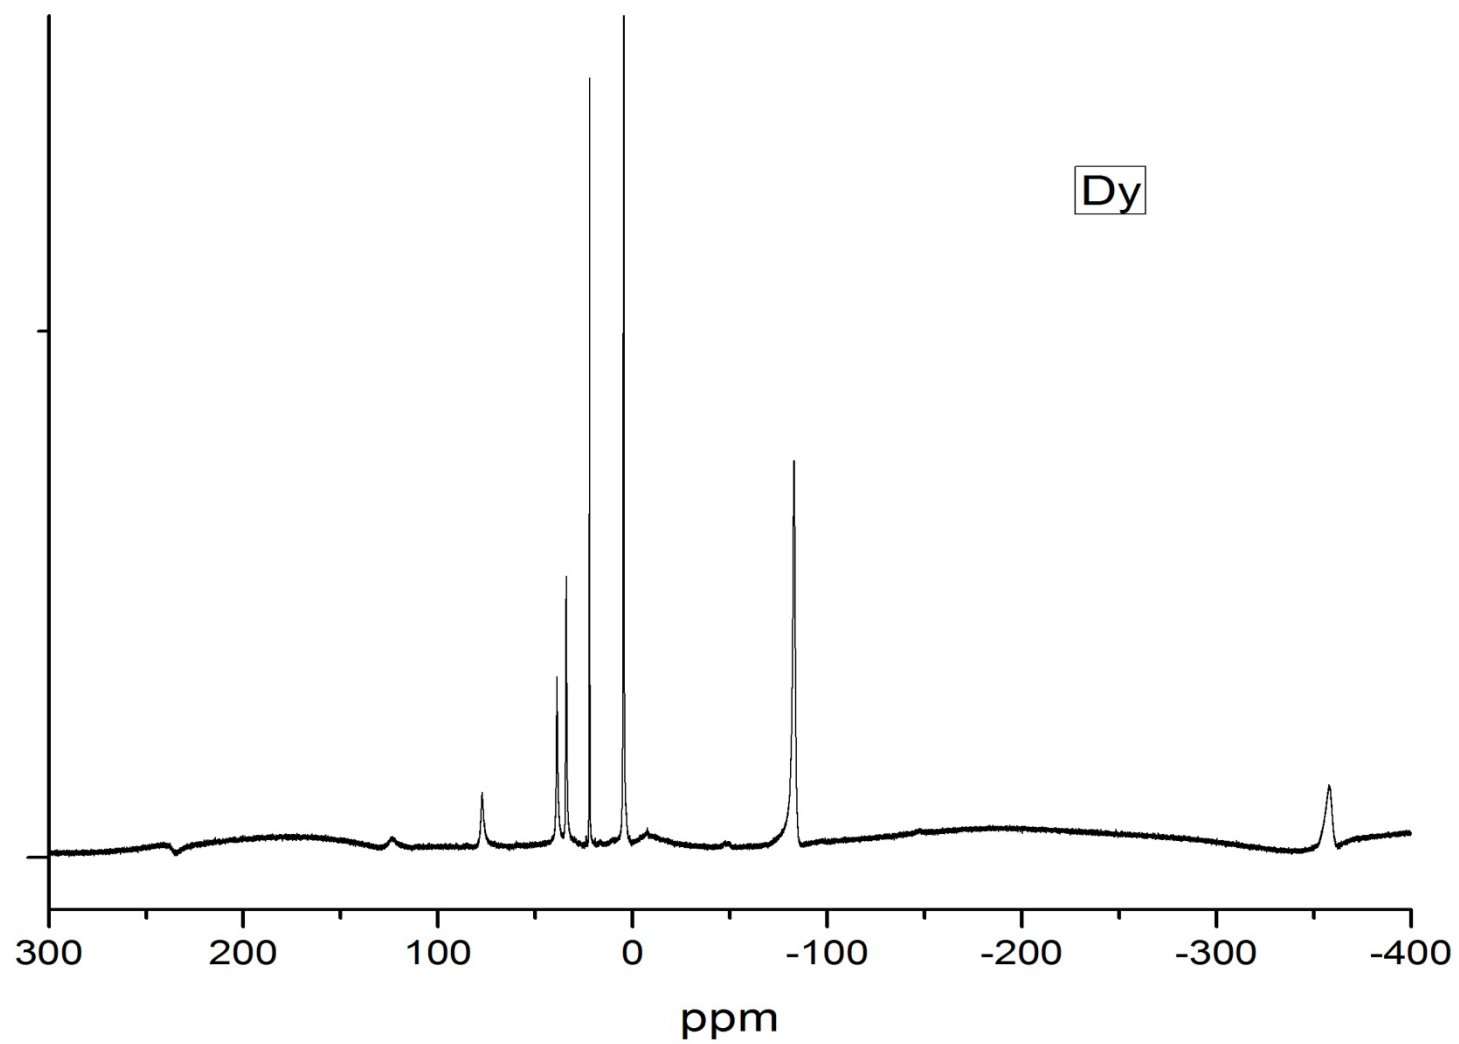

### S10. NMR Spectra of Sm-1

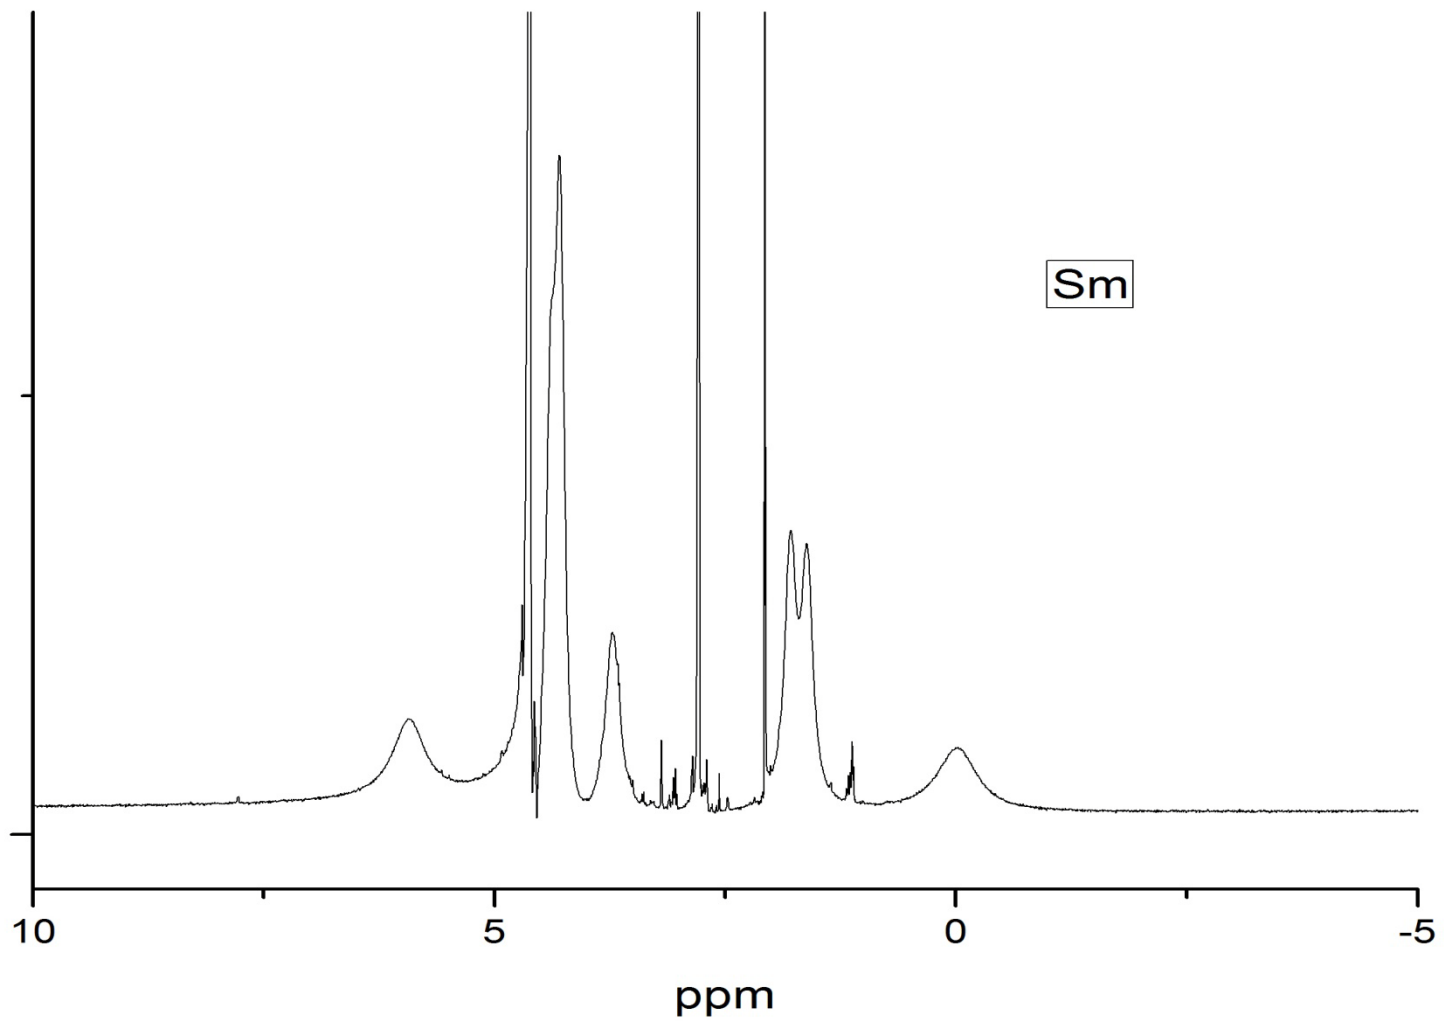

### S11. NMR Spectra of Nd-1

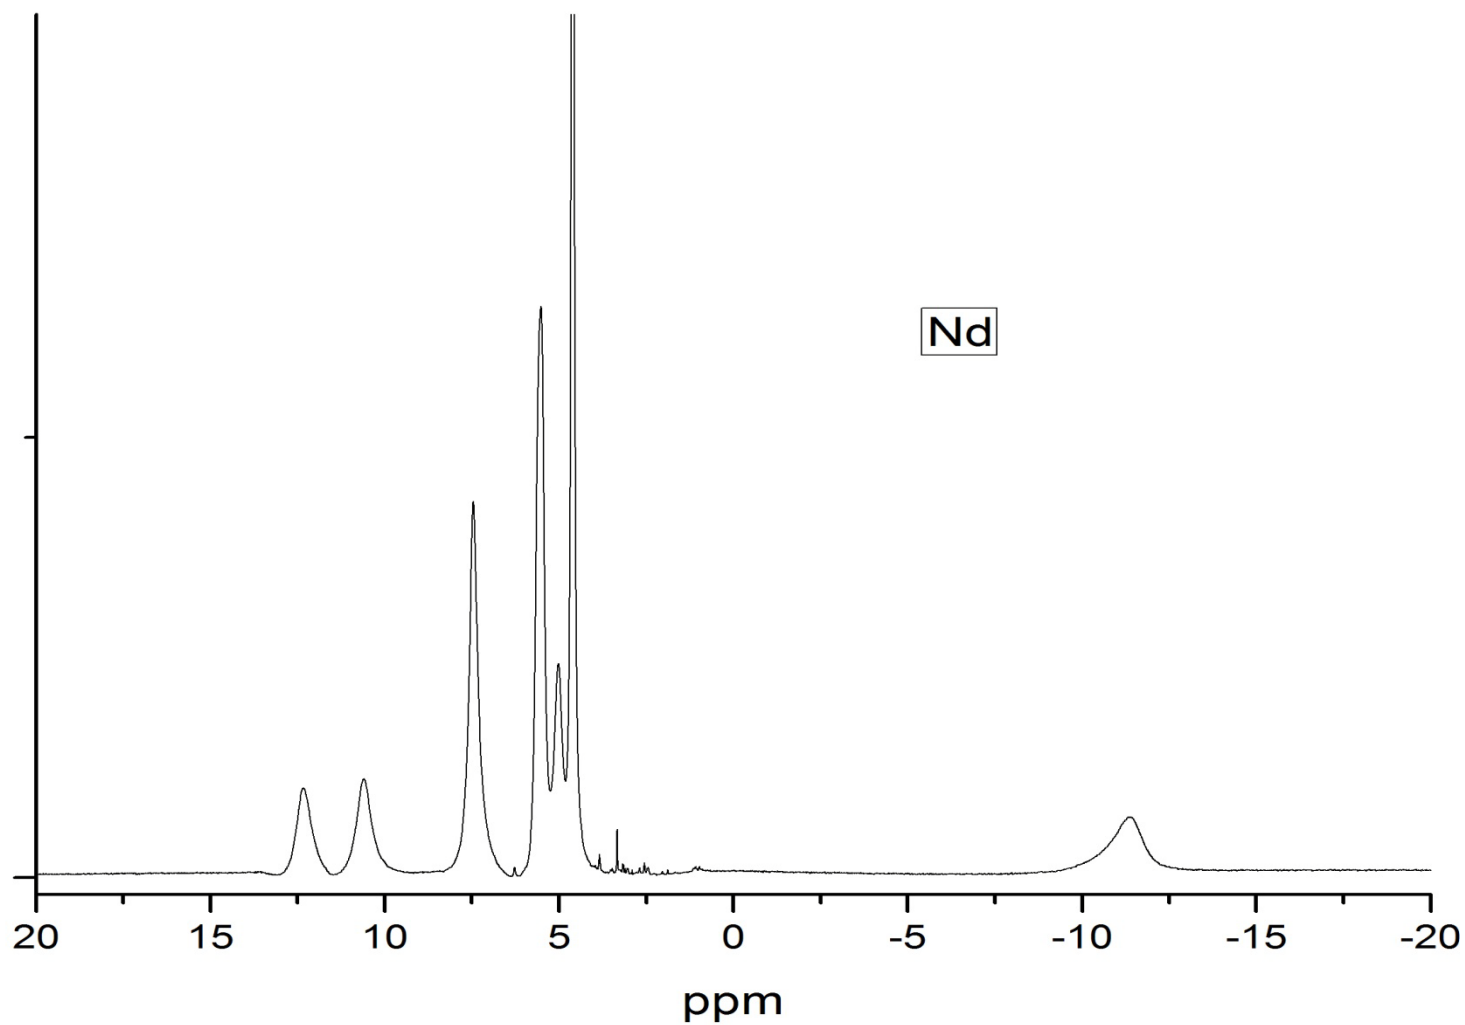

## S12. NMR Spectra of Pr-1

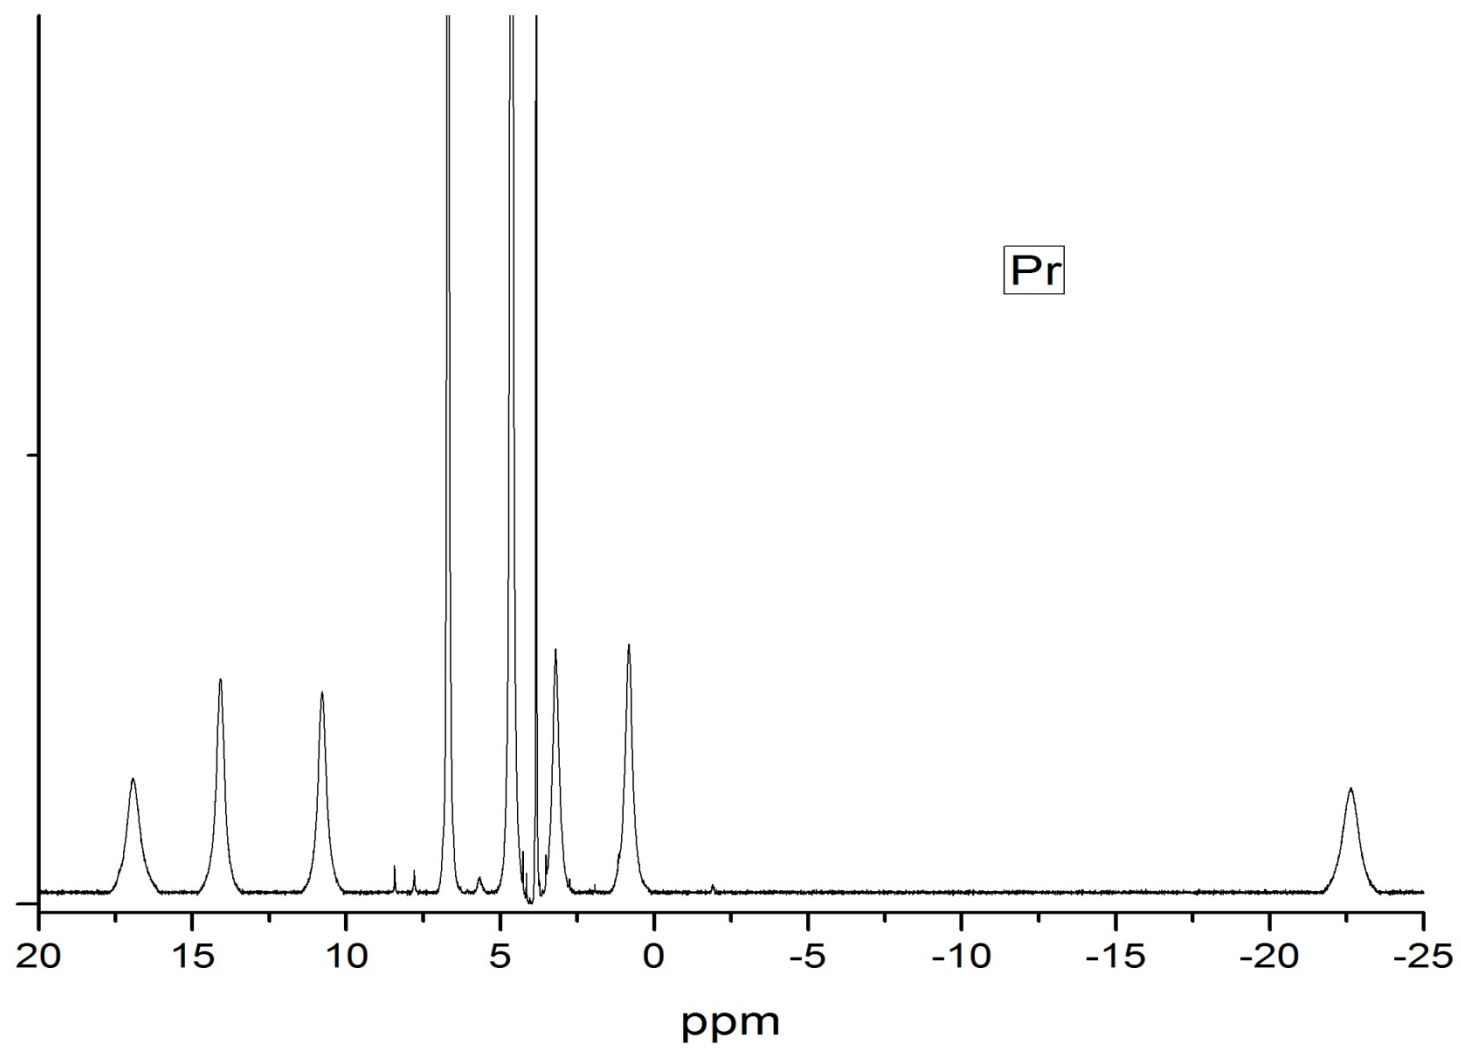

### S13. NMRD Profile of Gd-1

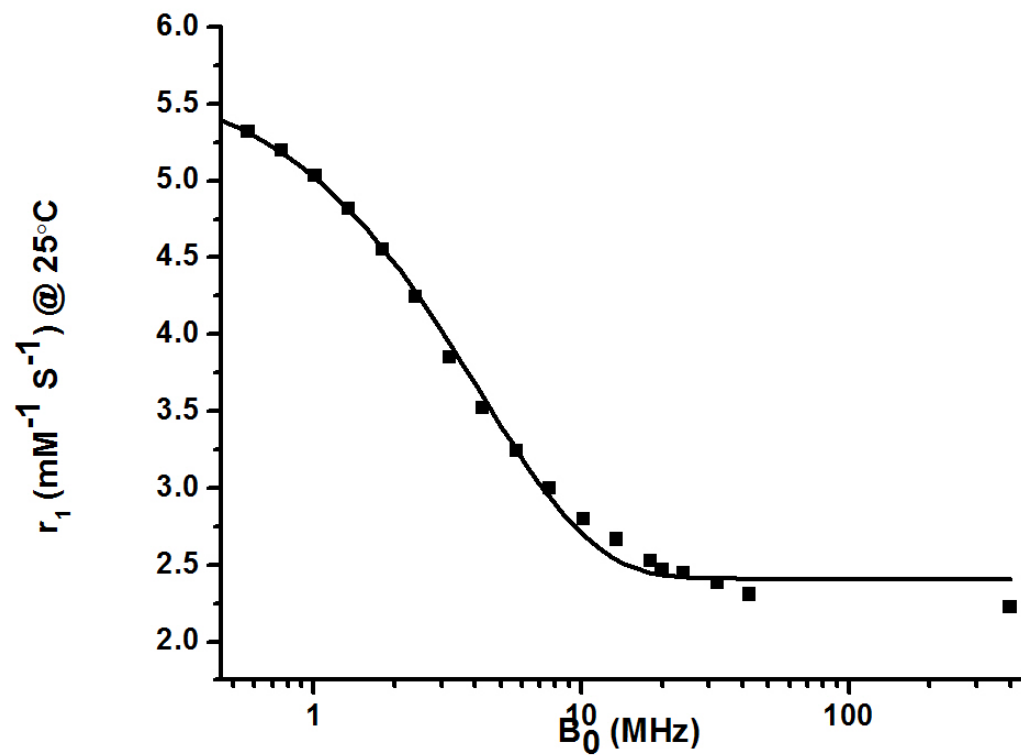

### S14. NMRD Profile of 2

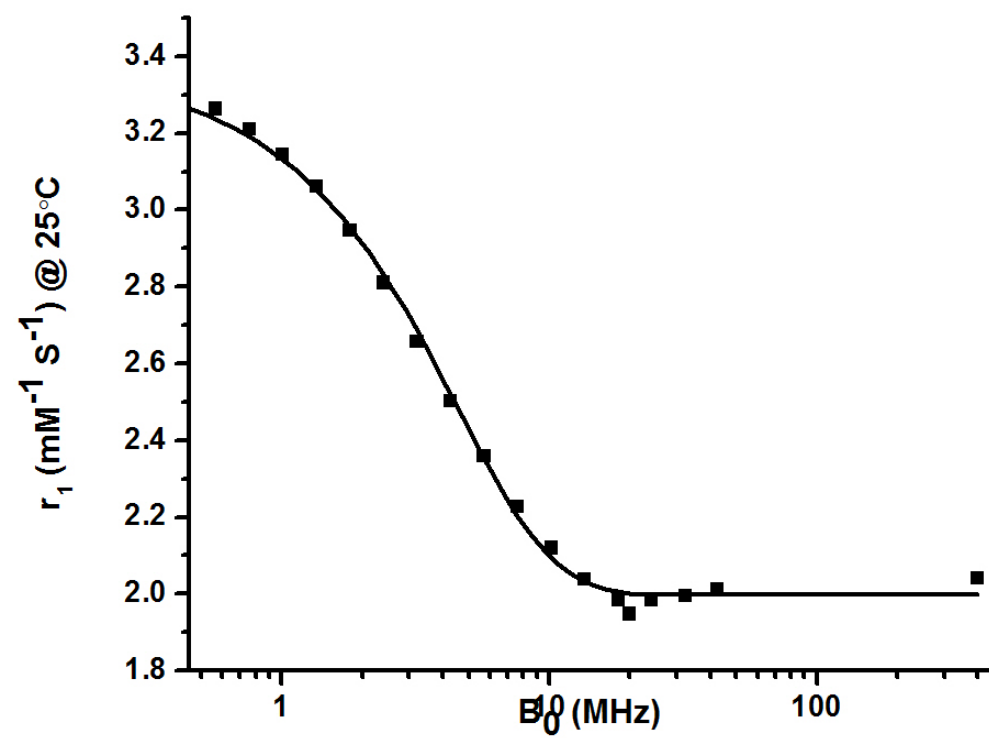





### S15. NMRD Profile of 3

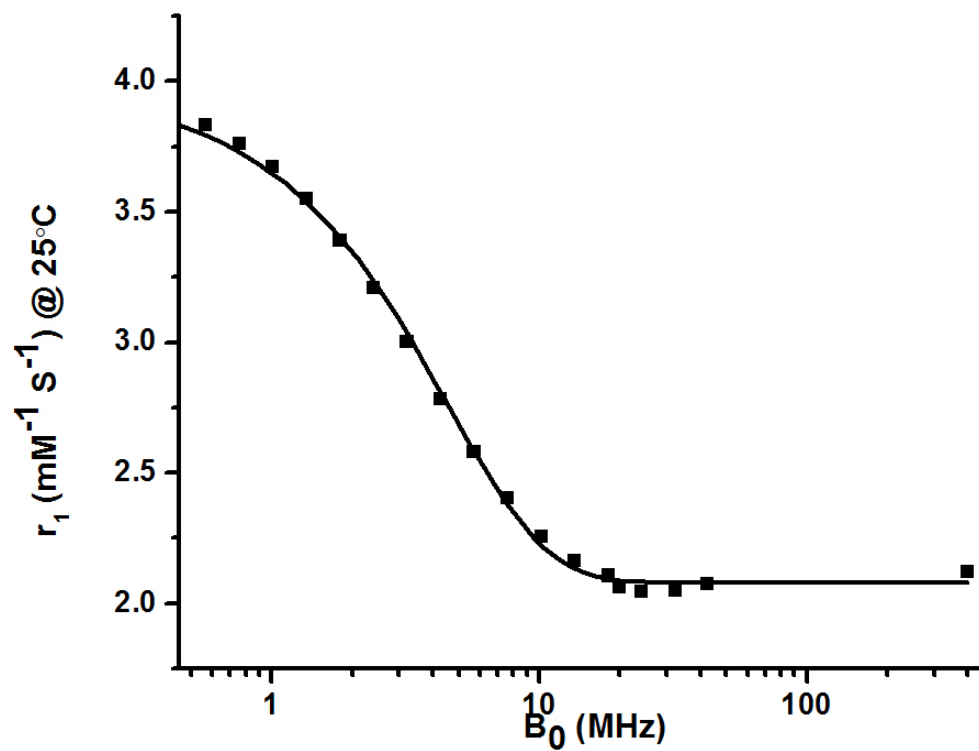



### S16.CEST Spectra of Dy-1

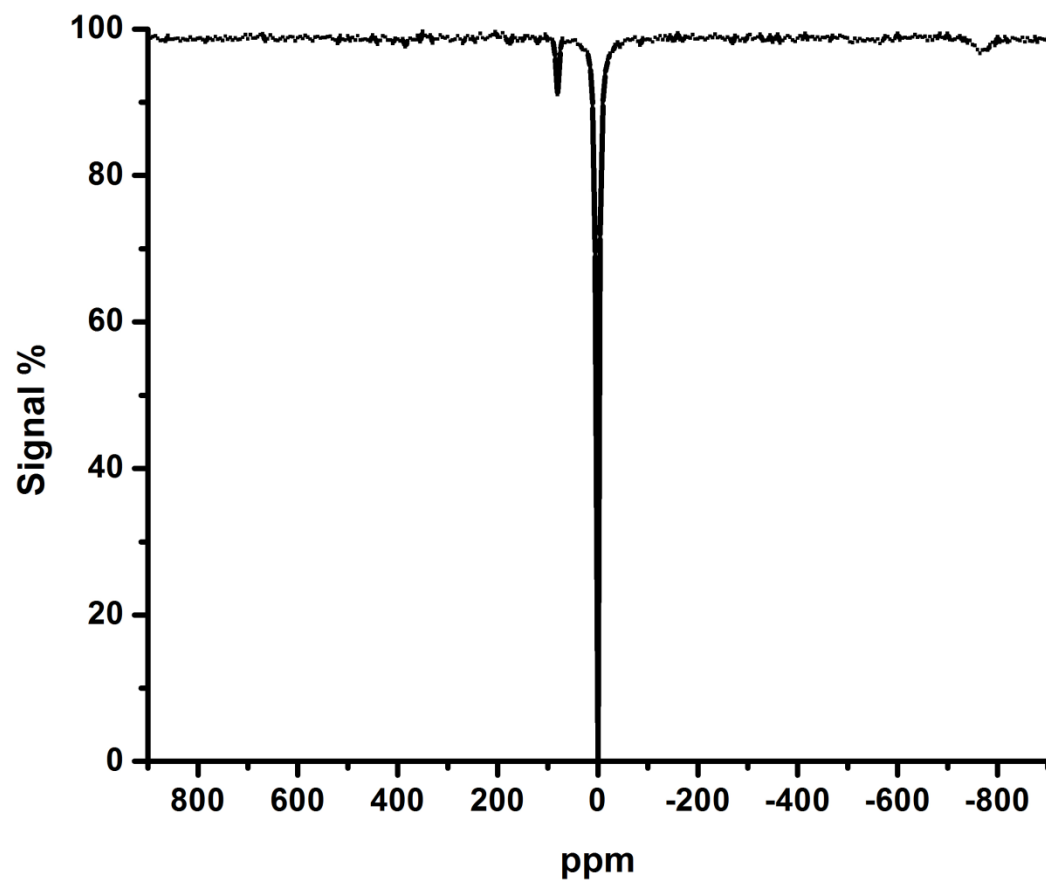

### S17.CEST Spectra of Dy-2

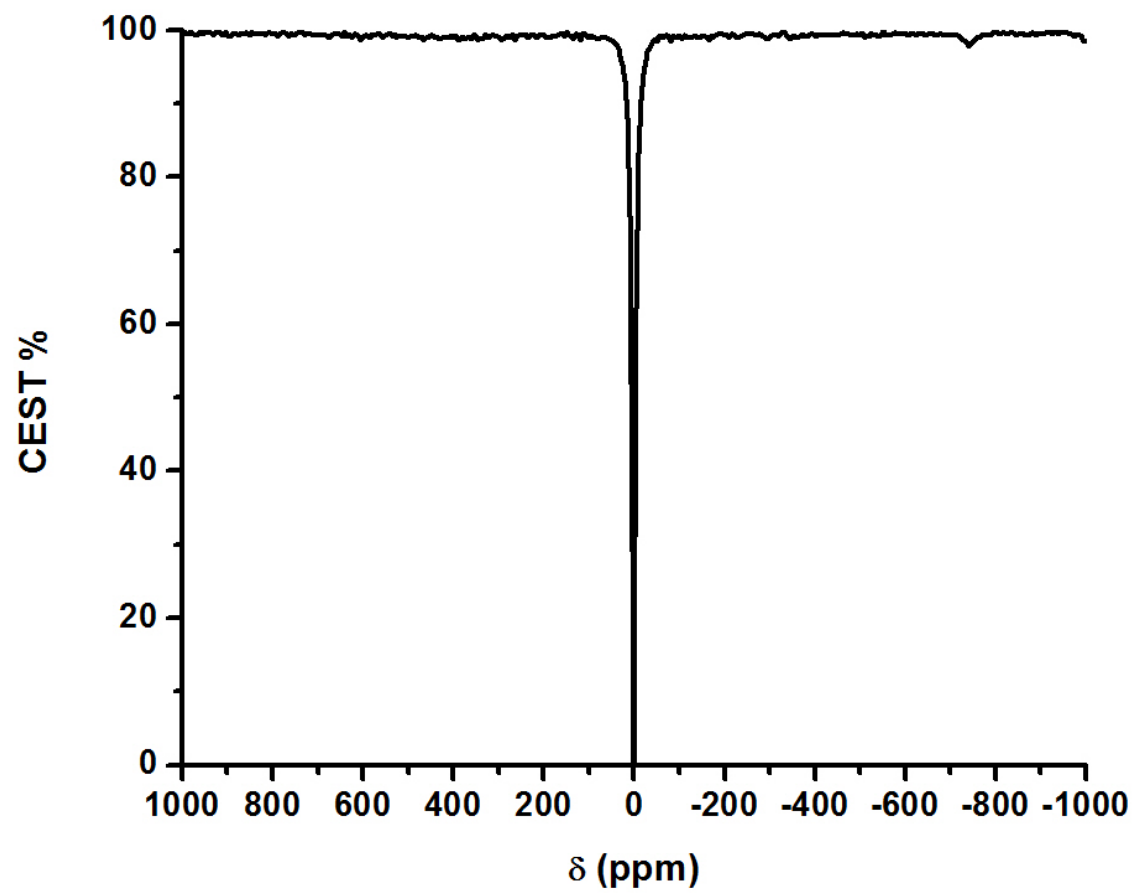

### S18.CEST Spectra of Dy-3

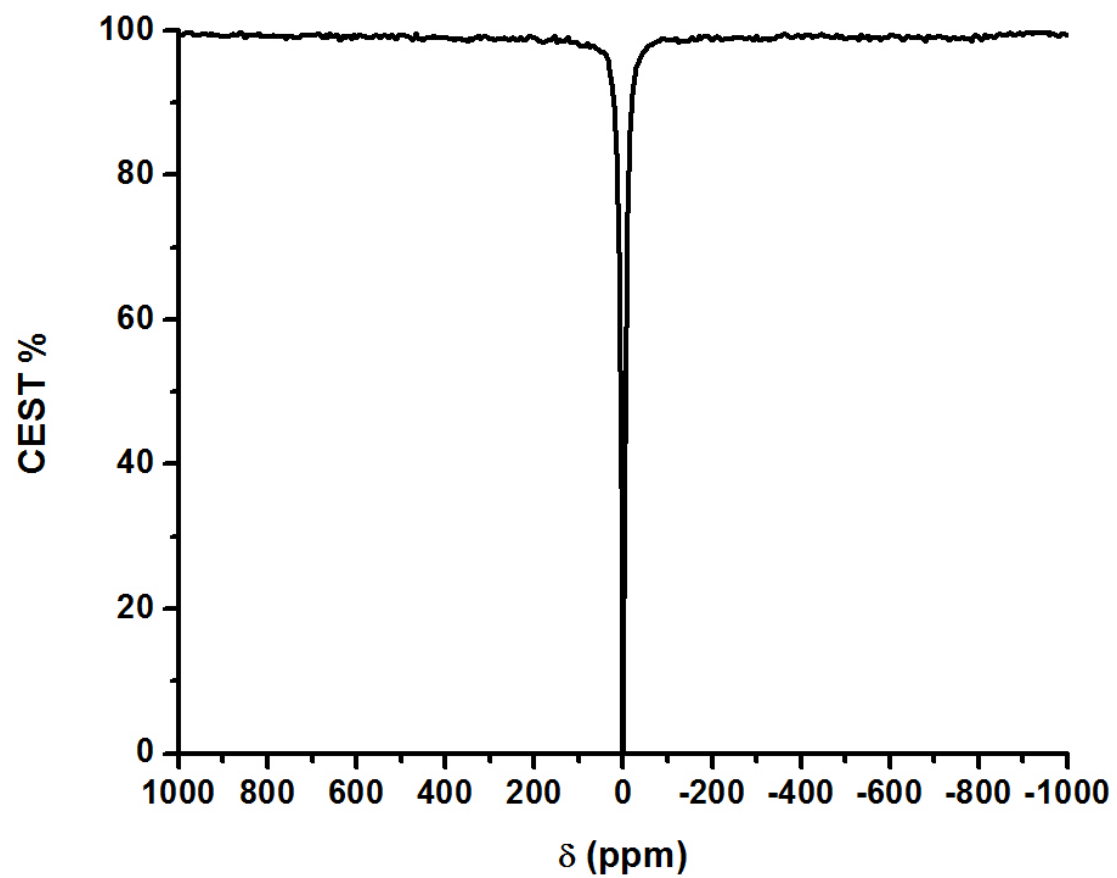

### S19.CEST Spectra of Tb-1

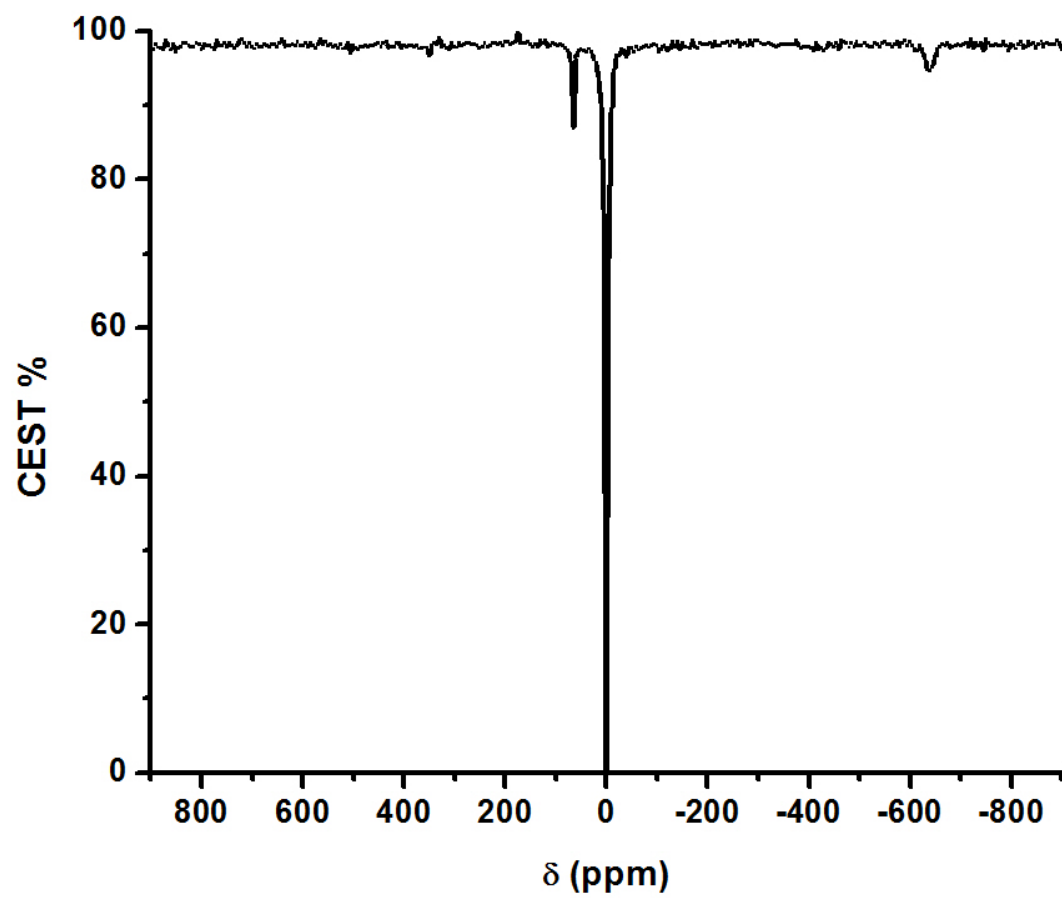

### S20.CEST Spectra of Tb-2

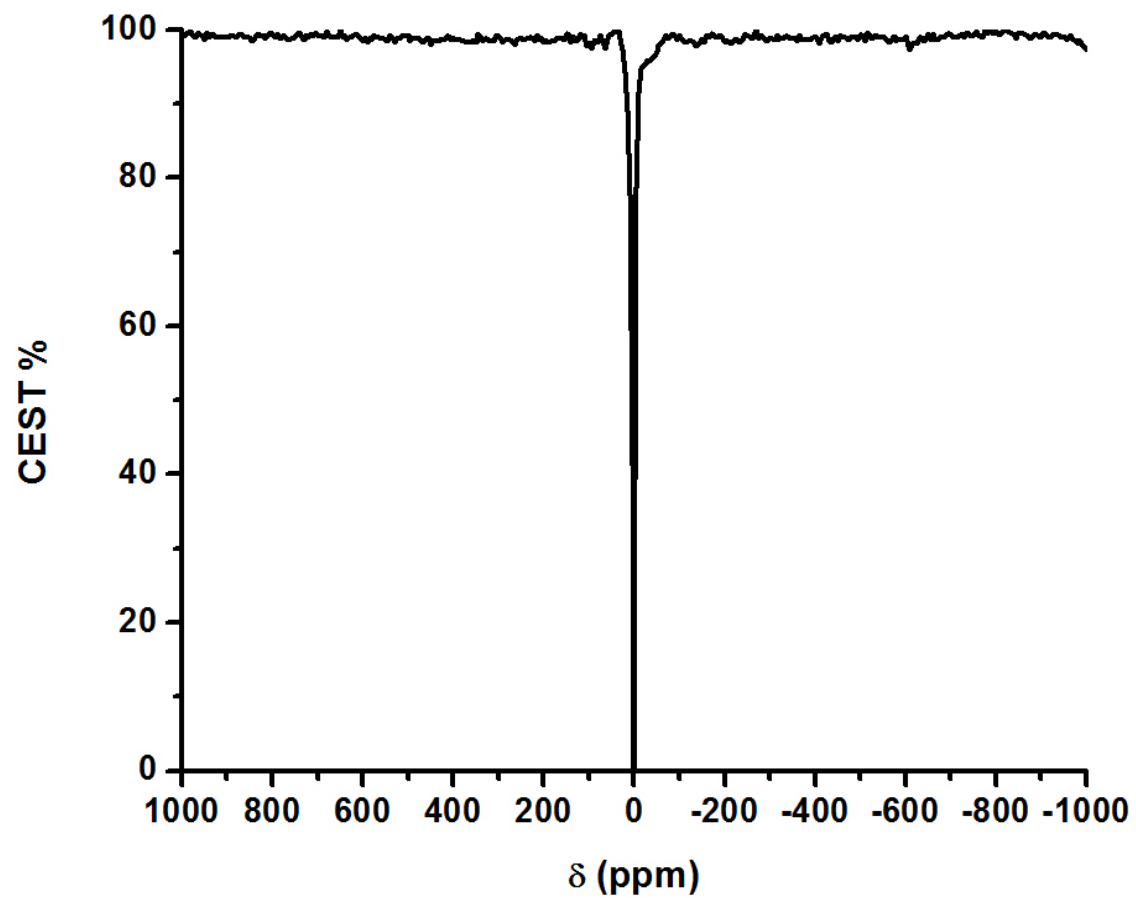



### S21.CEST Spectra of Tb-3

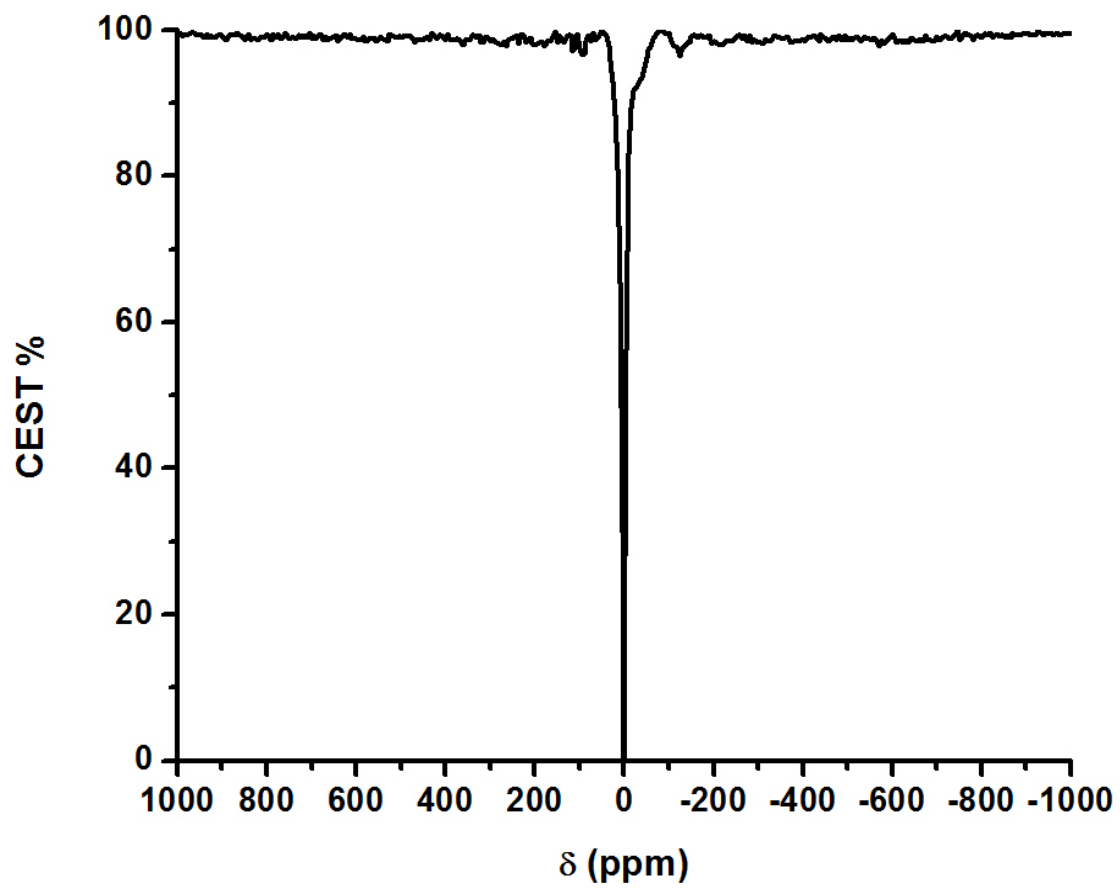

### S22.CEST Spectra of Tm-1

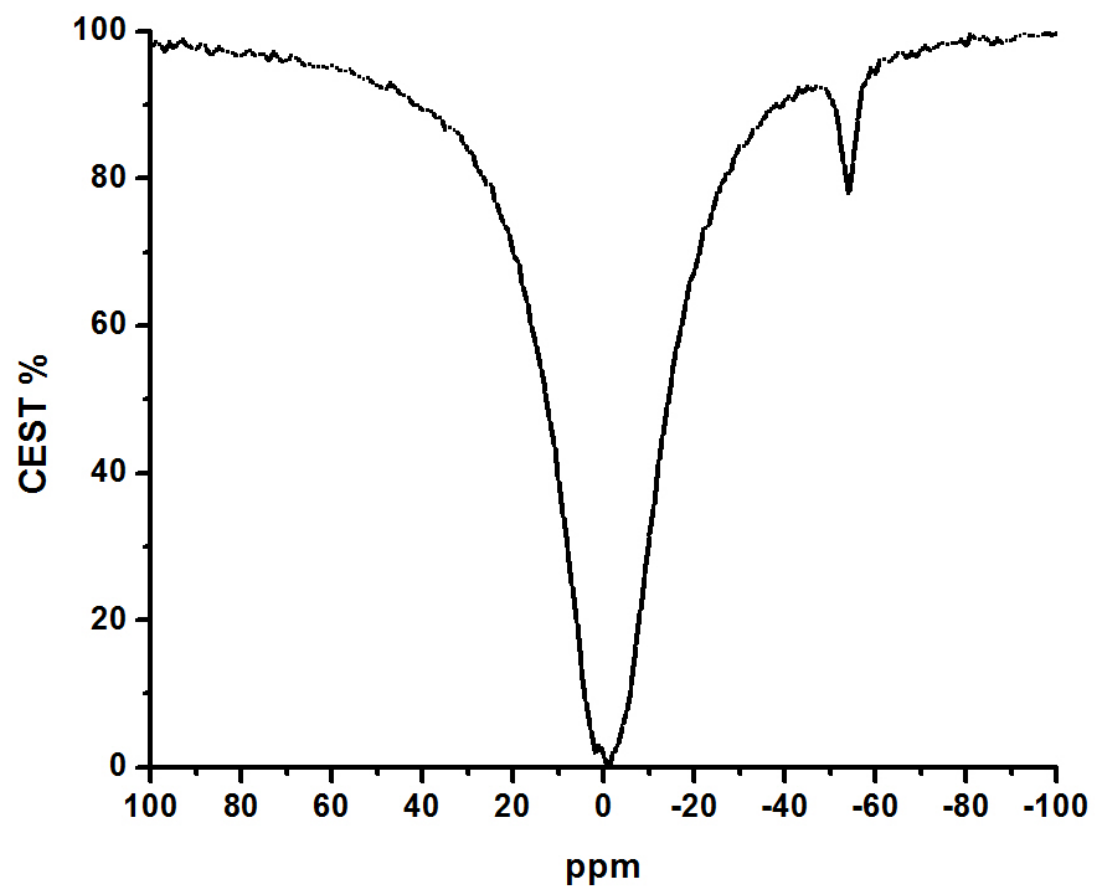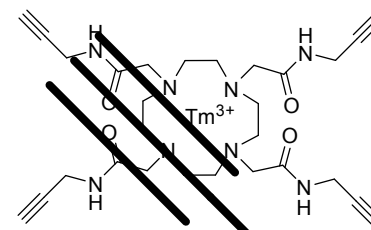

### S23.CEST Spectra of Tm-2

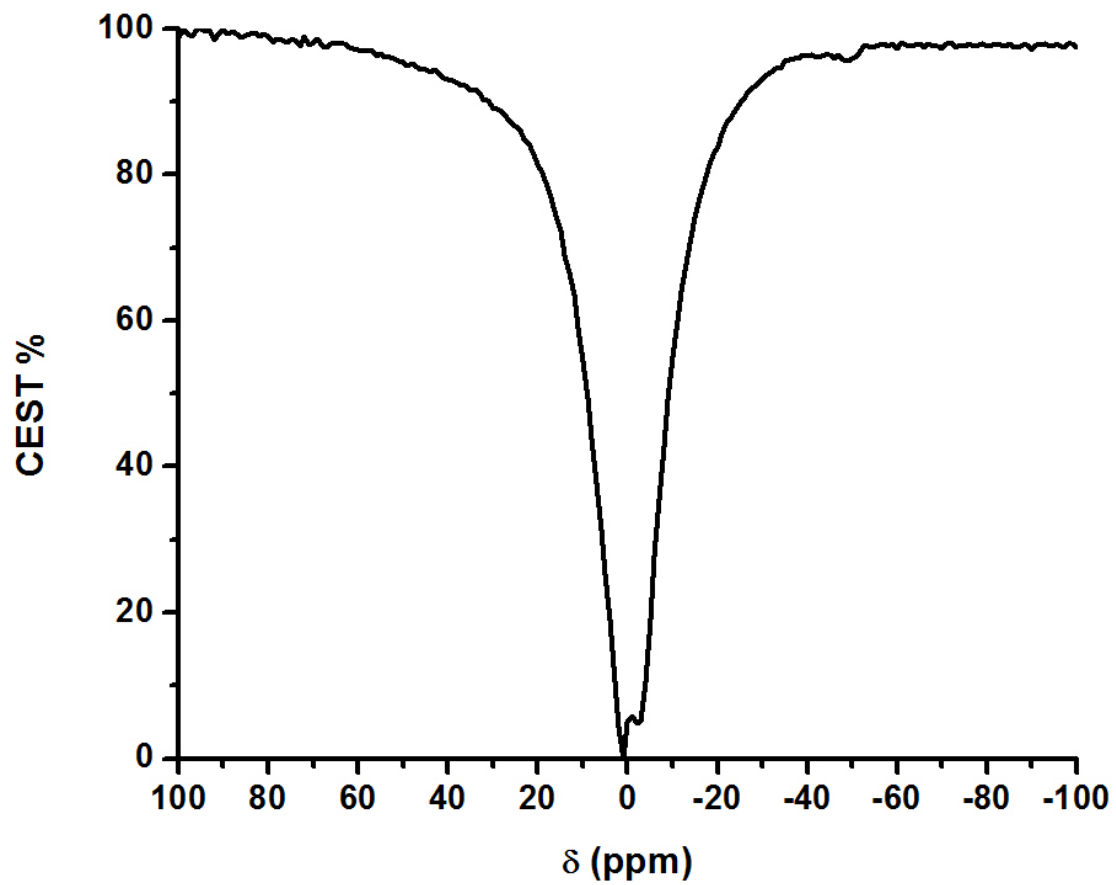

### S24.CEST Spectra of Tm-3

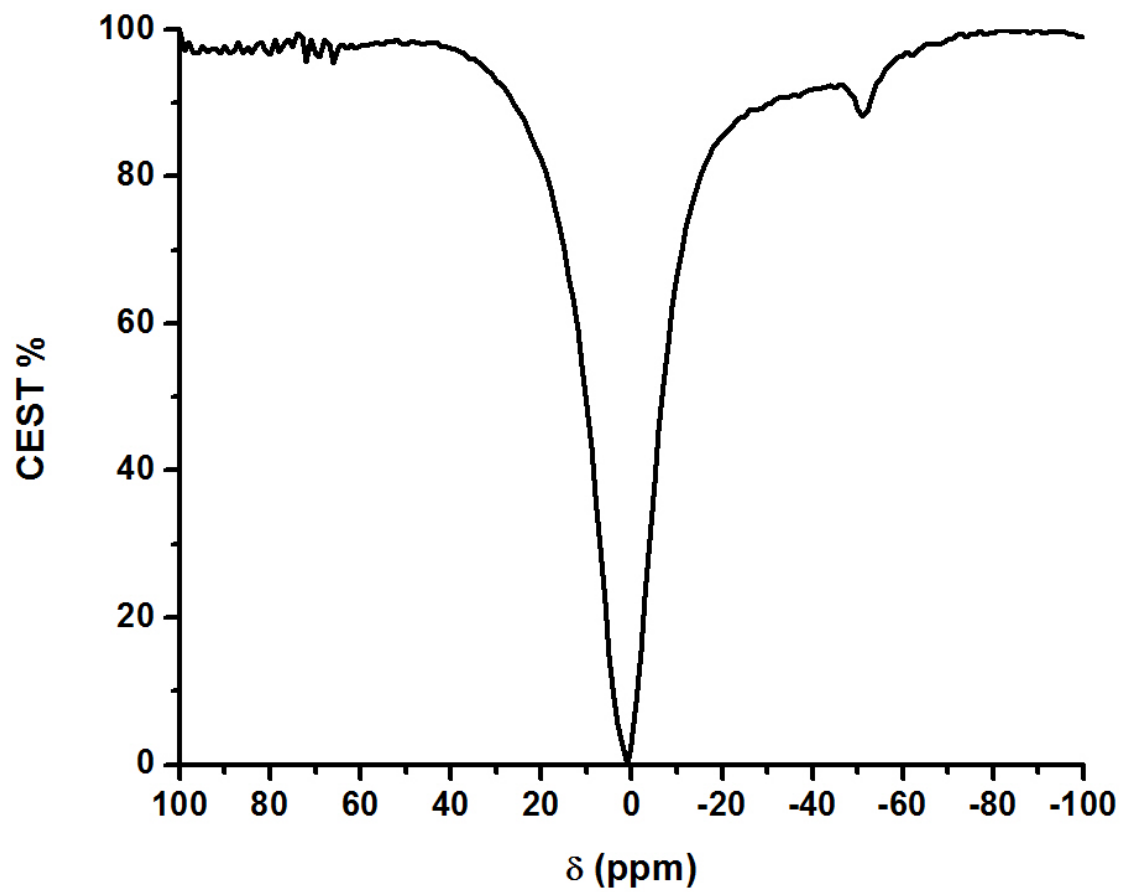

### S25. HPLC Trace of 2

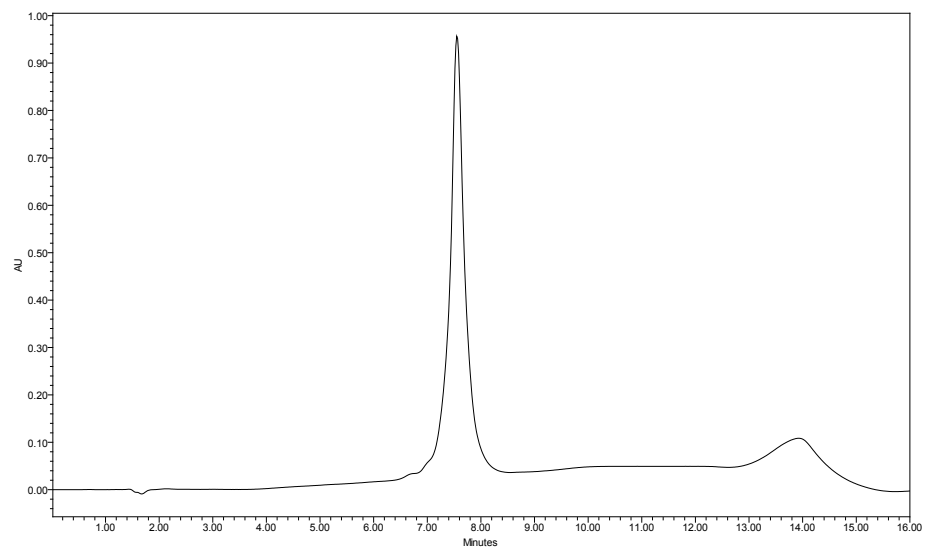

### S26. HPLC Trace of 3

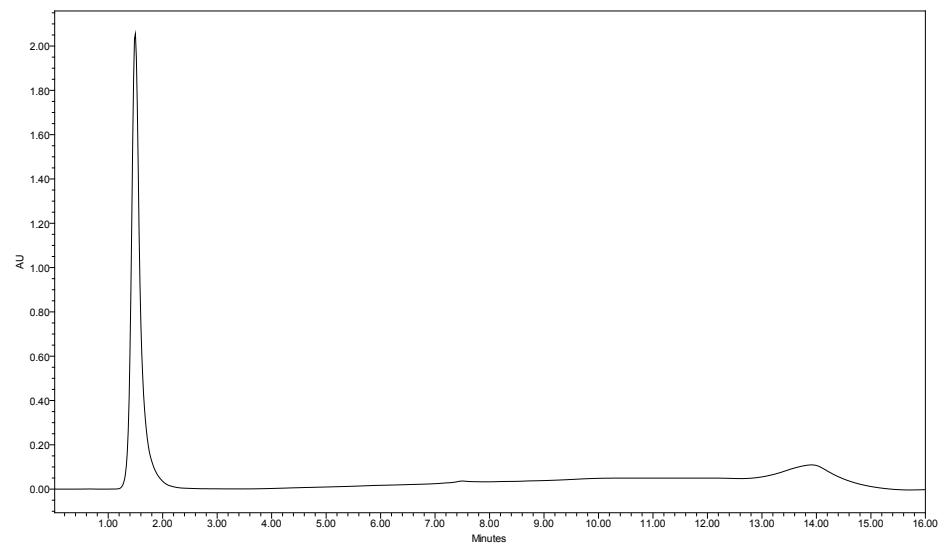

### S27. Relaxivity comparison of Gd series at 20 MHz

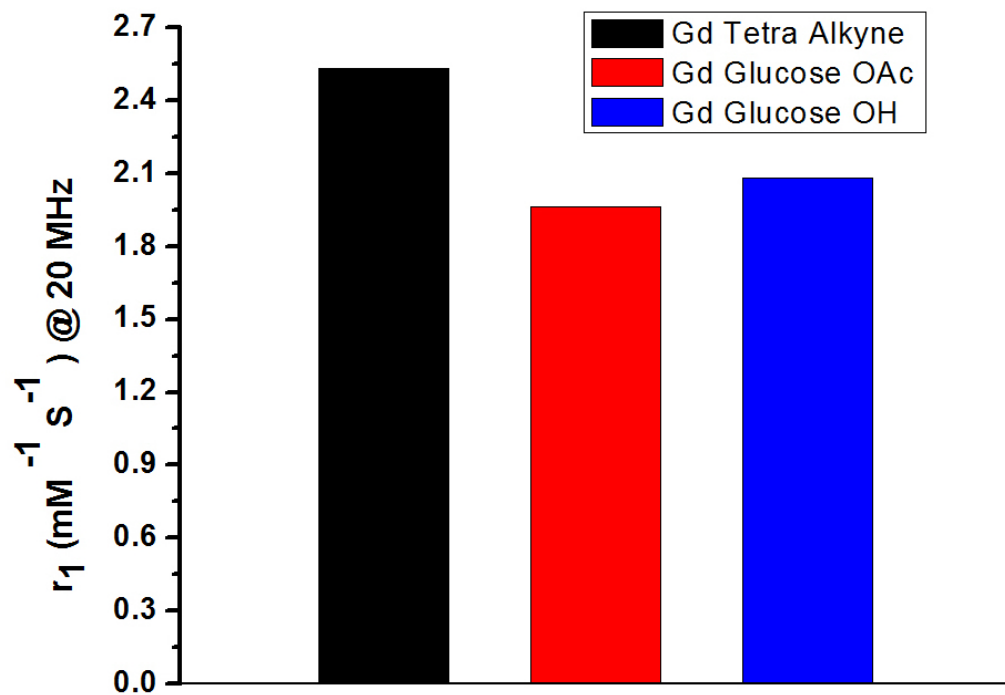

### S28. Relaxivity comparison of Gd series at 400 MHz

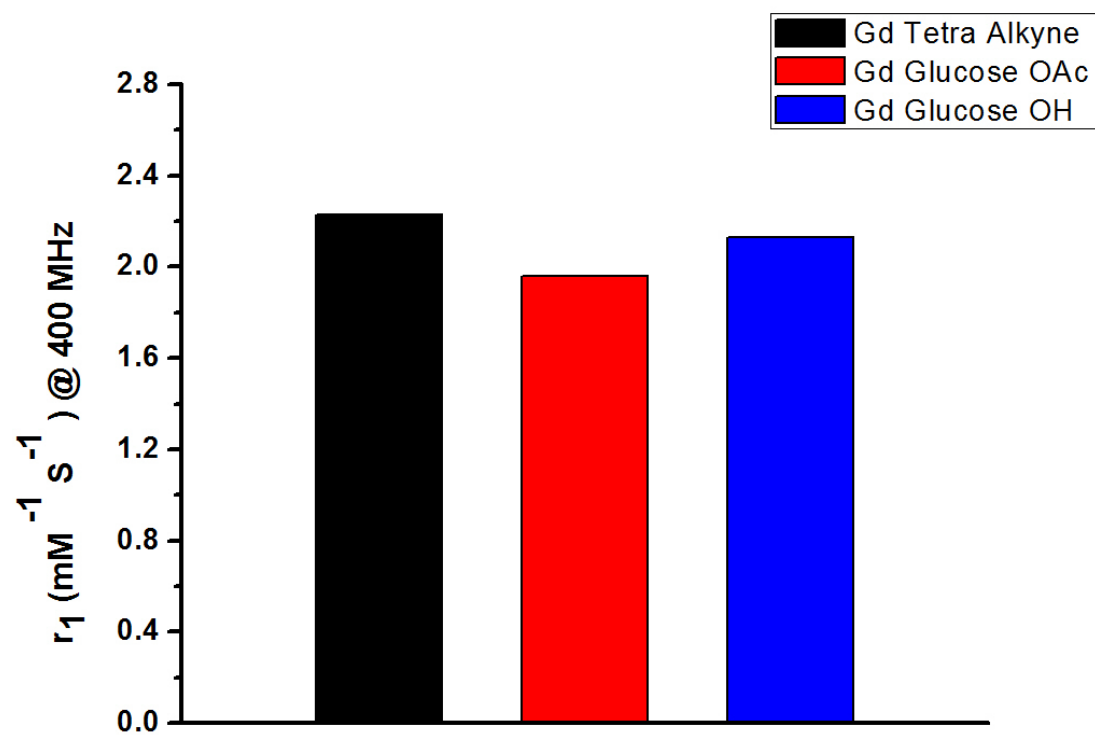

### S29. CEST comparison of Eu series (Water)

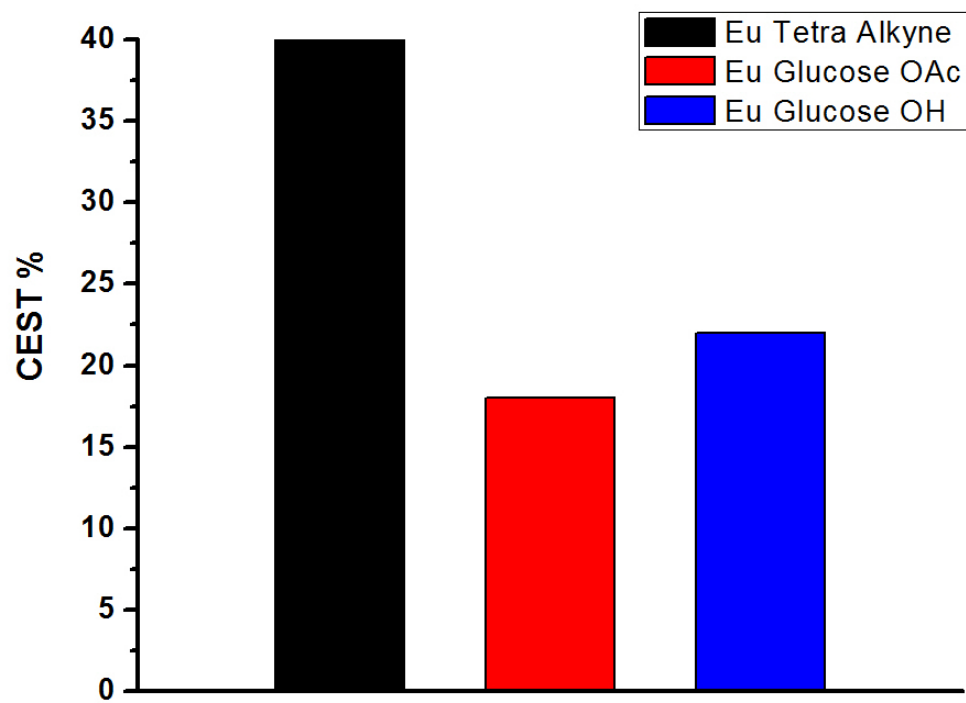



### S30. CEST comparison of Tm series (Amide)

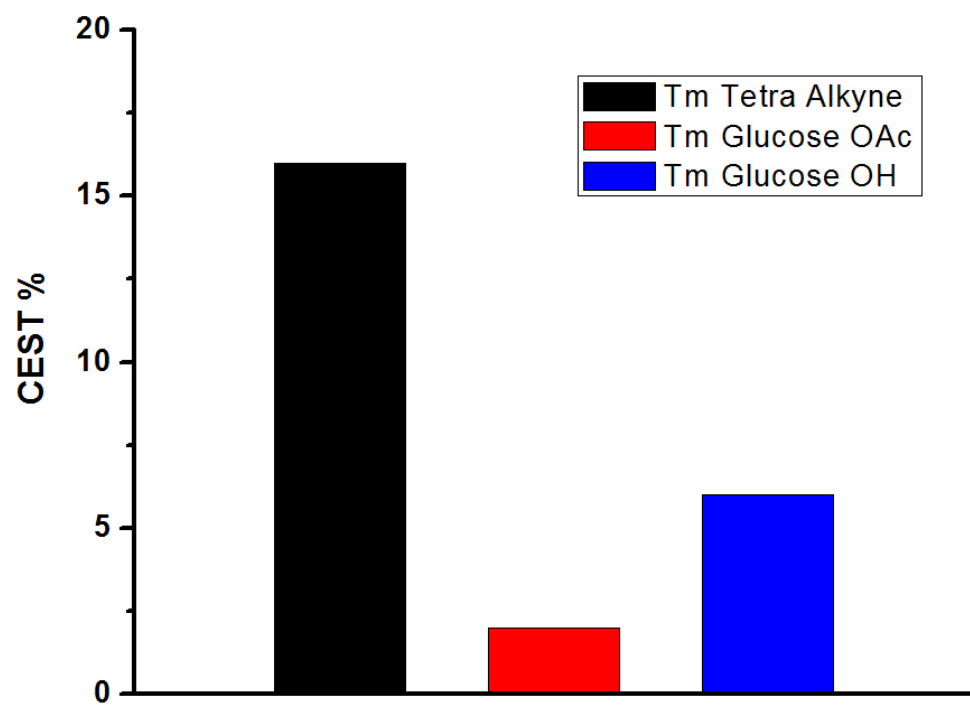

Supplement: c1ob06162c.pdf [file c1ob06162c.pdf]
